# Supplementary material for: LRIG proteins regulate lipid metabolism via BMP signaling and affect the risk of type 2 diabetes
Source: PubMed Central journal article supplement (PMC7815736; doi:10.1038/s42003-020-01613-w), 2021-01-19
Supplement: 42003_2020_1613_MOESM1_ESM.pdf [file 42003_2020_1613_MOESM1_ESM.pdf]

## SUPPLEMENTARY INFORMATION

### **LRIG proteins regulate lipid metabolism via BMP signaling and affect the risk of type 2 diabetes**

Carl Herdenberg<sup>a</sup>, Pascal M. Mutie<sup>b</sup>, Ola Billing<sup>c</sup>, Ahmad Abdullah<sup>a</sup>, Rona J. Strawbridge<sup>d,e,f</sup>, Ingrid Dahlman<sup>g</sup>, Simon Tuck<sup>h</sup>, Camilla Holmlund<sup>a</sup>, Peter Arner<sup>g</sup>, Roger Henriksson<sup>a</sup>, Paul W. Franks<sup>b</sup>, Håkan Hedman<sup>a,\*</sup>

<sup>a</sup>Department of Radiation Sciences, Umeå University, SE-90187 Umeå, Sweden. <sup>b</sup>Genetic and Molecular Epidemiology Unit, Department of Clinical Sciences, Lund University, Skane University Hospital, Malmö, Sweden. <sup>c</sup>Department of Surgical and Perioperative Sciences, Surgery, Umeå University, SE-90187 Umeå, Sweden. <sup>d</sup>Institute of Health and Wellbeing, University of Glasgow, Glasgow, UK. <sup>e</sup>Department of Medicine Solna, Karolinska Institutet, Stockholm, Sweden. <sup>f</sup>Health Data Research UK, University of Glasgow, Glasgow, UK.

<sup>g</sup>Department of Medicine Huddinge, Karolinska Institutet, Stockholm, Sweden. <sup>h</sup>Umeå Center for Molecular Medicine, Umeå University, SE-90187 Umeå, Sweden.

\*Corresponding author; e-mail: hakan.hedman@umu.se

Supplementary Figure1

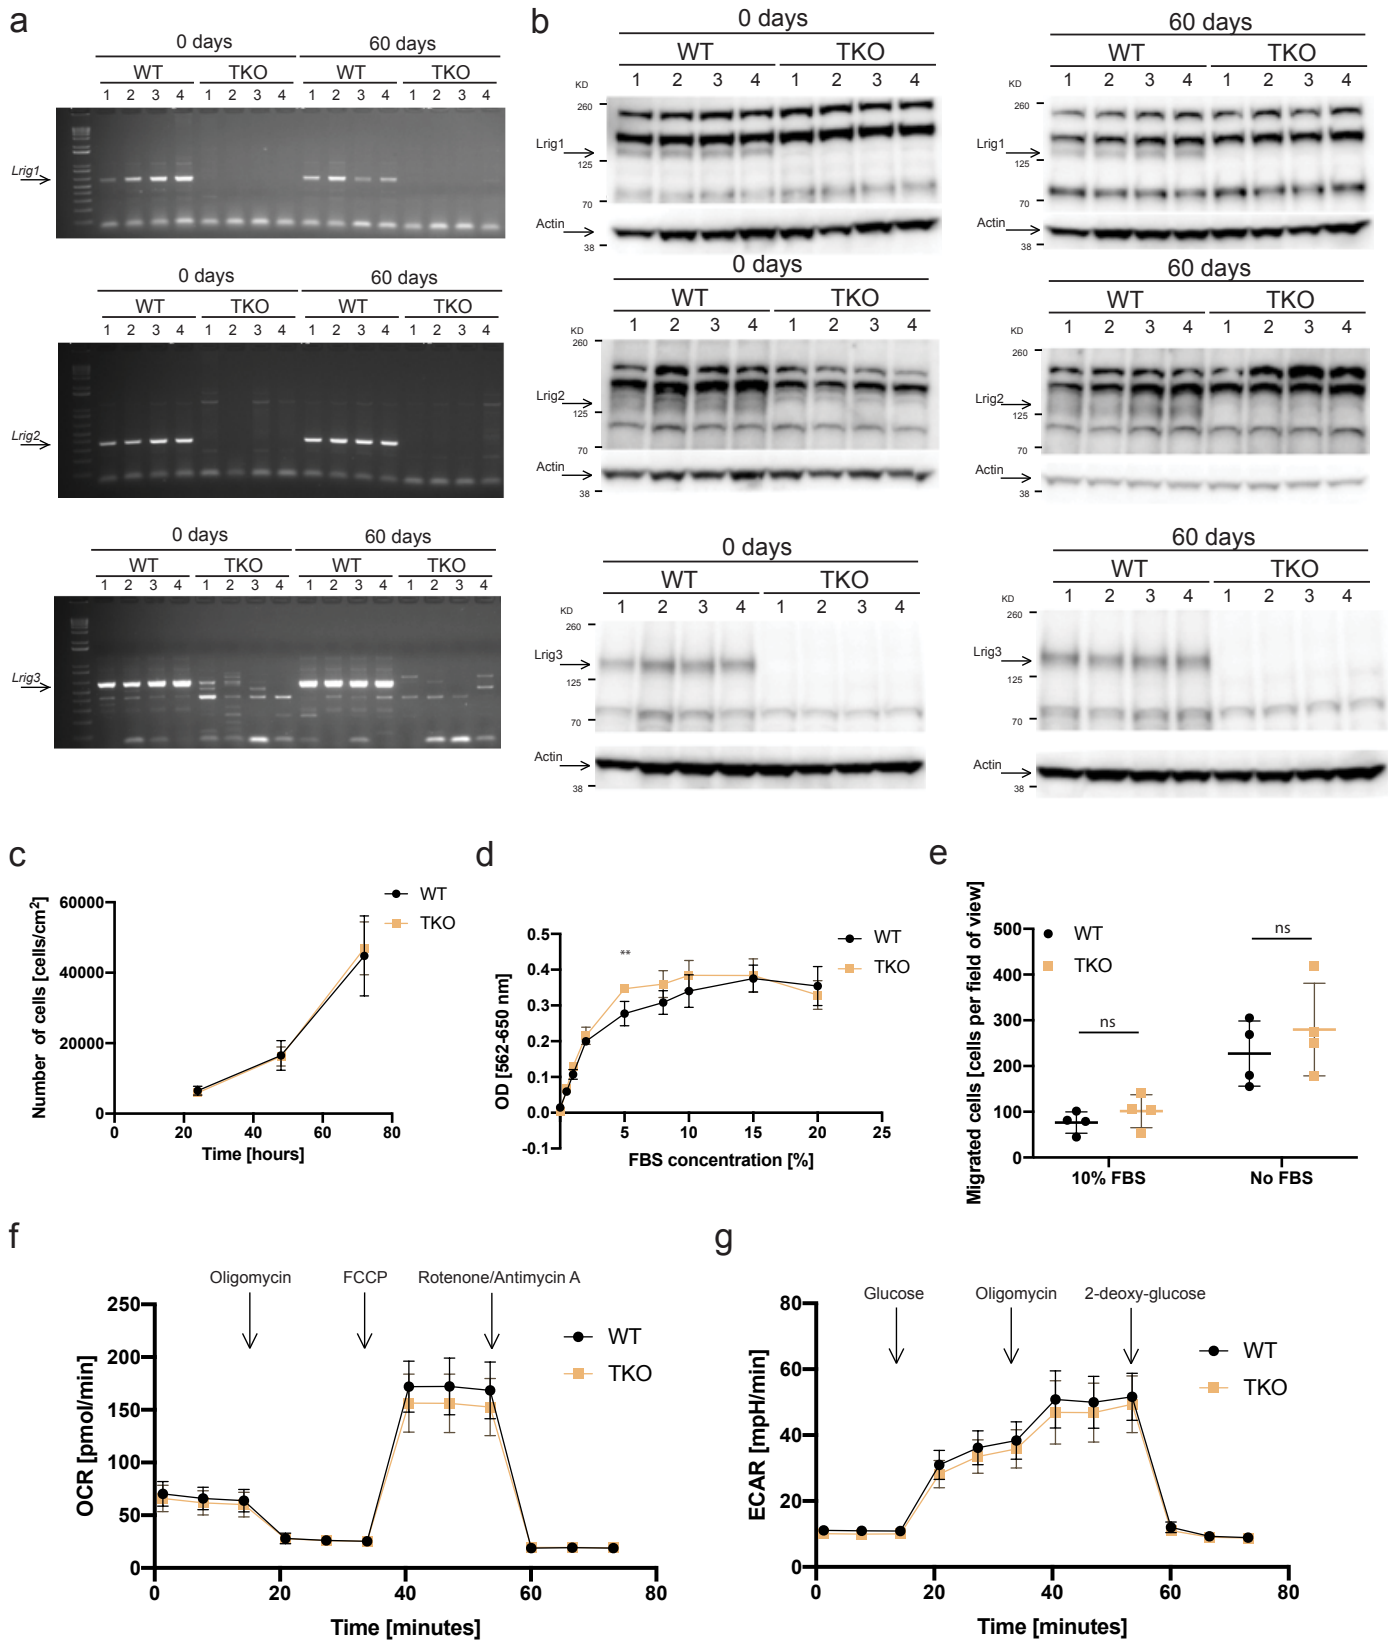

**Supplementary Figure 1: Characterization of wild-type (WT) and *Lrig*-null (TKO) mouse embryonic fibroblasts (MEFs).** MEFs with floxed *Lrig1*, *Lrig2*, and *Lrig3* alleles were transiently transduced with Cre recombinase-expressing adenovirus or transduction control adenovirus on four different occasions, creating four MEF line pairs, each consisting of a wild-type (WT1-4) and an *Lrig*-null (TKO1-4) cell line. **a** Images showing agarose gels for PCR genotyping of *Lrig1*, *Lrig2*, and *Lrig3* gene loci. DNA was prepared at day 0 and after 60 days of cell cultivation. Arrows indicate the expected size of the respective wild-type *Lrig* band. **b** *Lrig* Western blot analyses. Protein samples were prepared at the indicated times of cultivation (0 or 60 days), separated by SDS page followed by Western blotting using antibodies specific for *Lrig1*, *Lrig2*, *Lrig3*, and actin. Specific bands are indicated with arrows. **c** Graph showing cell proliferation of wild-type and *Lrig*-null MEFs, measured by the number of cells per cm<sup>2</sup> at 24, 48 and 72 hours after plating. **d** Cell proliferation assay showing apparent cell viability at different FBS concentrations. Wild-type and *Lrig*-null MEFs were seeded at different FBS concentrations. Forty-eight hours after seeding, the relative number of cells was quantified using an MTT assay. Shown are the OD values from the MTT assay. **e** Cell migration assay with wild-type and *Lrig*-null MEFs. Cells were seeded in the upper compartments of transwell chambers with the lower compartment containing standard culture medium with or without 10% FBS. Twenty-four hours after the cell seeding, the transmigrated cells were fixated, stained with crystal violet, and manually counted under a microscope. **f** Aerobic metabolism: oxygen consumption rates (OCR) were analyzed for wild-type and *Lrig*-null MEFs on a Seahorse XF instrument. The indicated reagents were added at the indicated times. **g** Anaerobic metabolism: extracellular acidification rates (ECAR) were analyzed for wild-type and *Lrig*-null MEFs on a Seahorse XF instrument. The indicated reagents were added at the indicated times. The plotted values in c-g represent means from four biological replicates, each with three experimental repeats. The error bars represent the standard deviations of means from four biological replicates. <sup>ns</sup> P>0.05, \*\* P<0.01 (Student's t-test).

Supplementary Figure 2

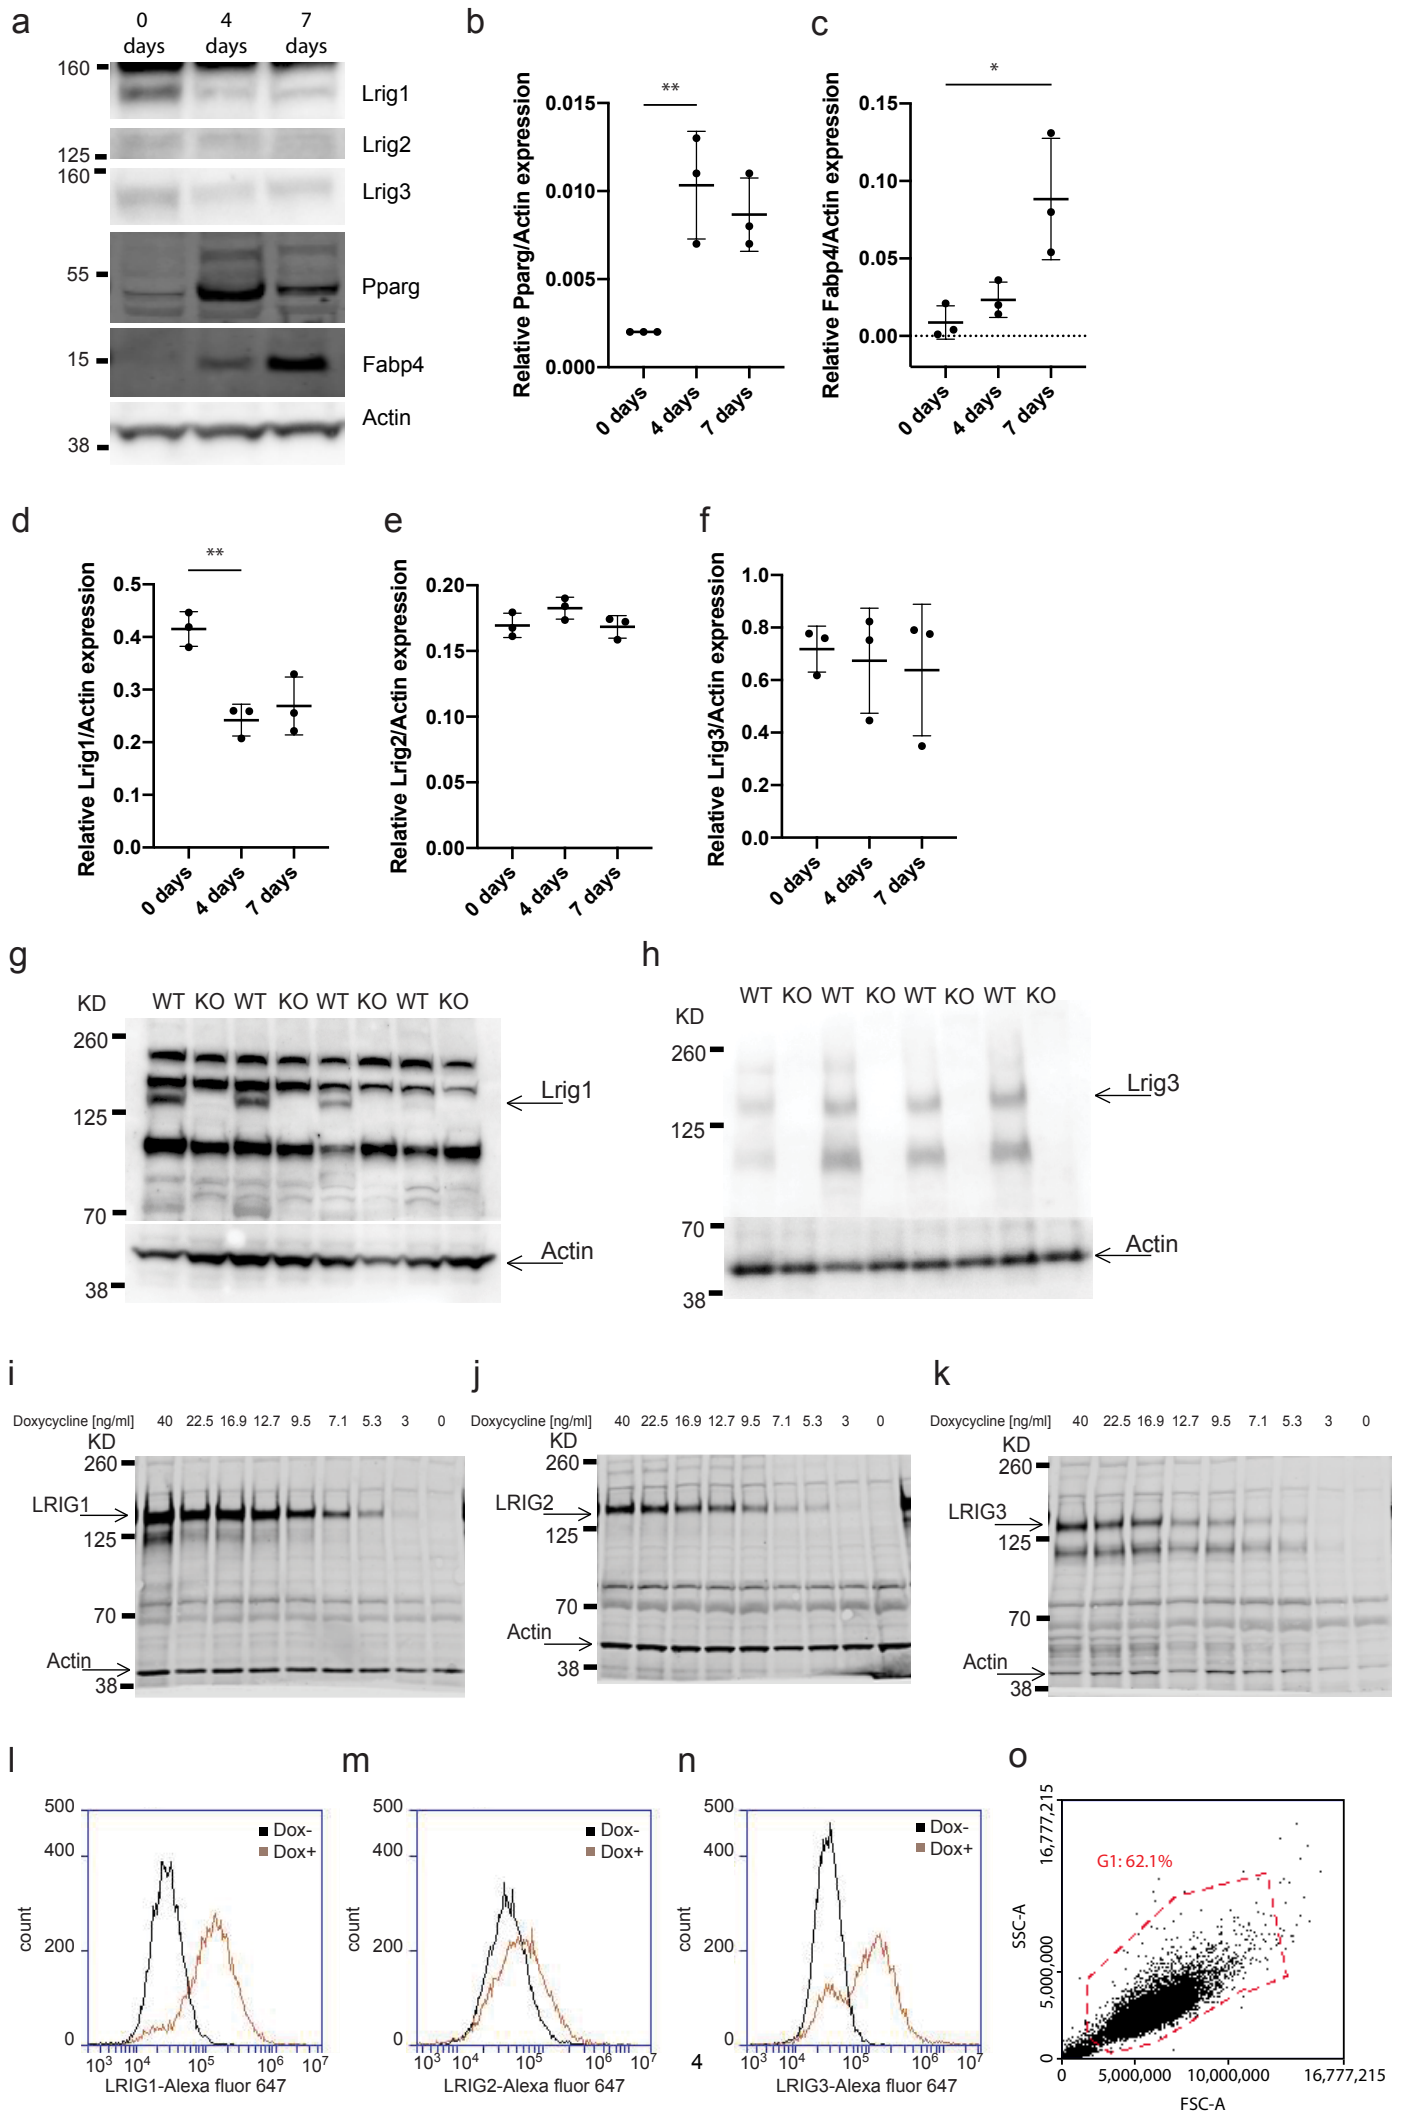

**Supplementary Figure 2: LRIG protein expression analyses of single *Lrig*-knockout and *LRIG*-inducible MEFs.** **a** Representative Western blots for *Lrig1*, *Lrig2*, *Lrig3*, *Pparg*, *Fabp4*, and actin, which was used as loading control, at 0, 4, and 7 days after the adipogenic induction of wild-type MEFs. **b-f** Quantifications of the Western blots of the respective protein at 0, 4, and 7 days after adipogenic induction. Shown are the results of three independent experiments. **b** Relative expression of *Pparg*/actin. **c** Relative expression of *Fabp4*/actin. **d** Relative expression of *Lrig1*/actin. **e** Relative expression of *Lrig2*/actin. **f** Relative expression of *Lrig3*/actin. **g** Western blot analysis showing the protein expression of *Lrig1* and actin in wild-type (WT) and *Lrig1*-null (KO) MEF clones. **h** Western blot analysis showing the protein expression of *Lrig3* and actin in wild-type (WT) and *Lrig3*-null (KO) MEF clones. **i-k** Western blots showing LRIG protein expression in LRIG-inducible MEF lines that had been treated with different concentrations of doxycycline. Shown are blots for LRIG1-inducible cells (i), LRIG2-inducible cells (j), and LRIG3-inducible cells (k). LRIG proteins were detected with an anti-FLAG antibody recognizing a FLAG epitope present on the induced LRIG proteins. Actin was used as the protein loading control. **l-o** Flow cytometry analyses on *Lrig*-null cell lines with inducible *LRIG1*, *LRIG2*, or *LRIG3* FLAG-tagged genes. LRIG protein expression was induced by treatment with 1  $\mu$ g/ml doxycycline for 24 hours, followed by anti-FLAG antibody staining and flow cytometry analysis. The overlay histograms show LRIG1-inducible cells (l), LRIG2-inducible cells (m), and LRIG3-inducible cells (n) with or without induction by doxycycline treatment. The cells were gated according to their side scatter (SSC) and forward scatter (FSC); an example of the gating strategy is shown in (o). Ten-thousand G1-gated events were acquired for each histogram

Supplementary Figure 3

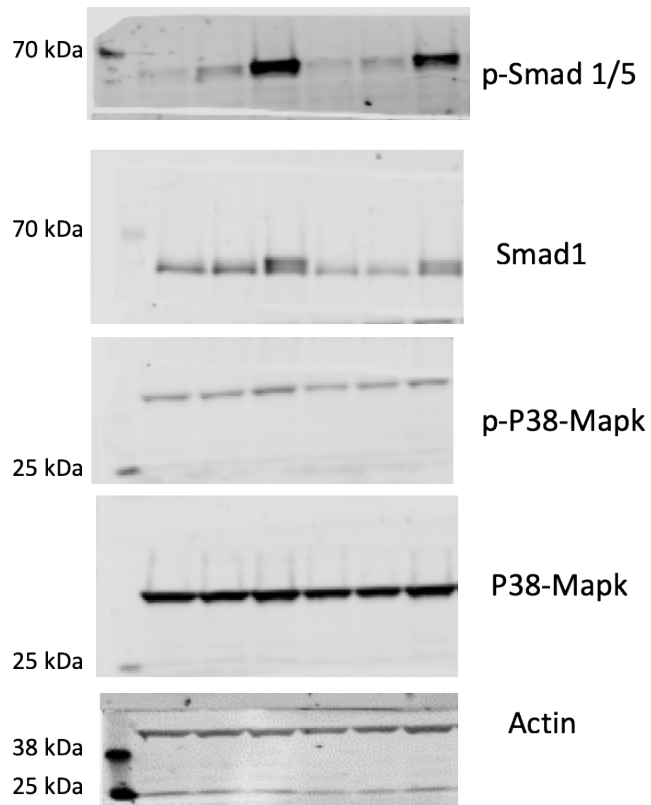

**Supplementary Figure 3: Uncropped scans of Western blots in Fig. 2g.**

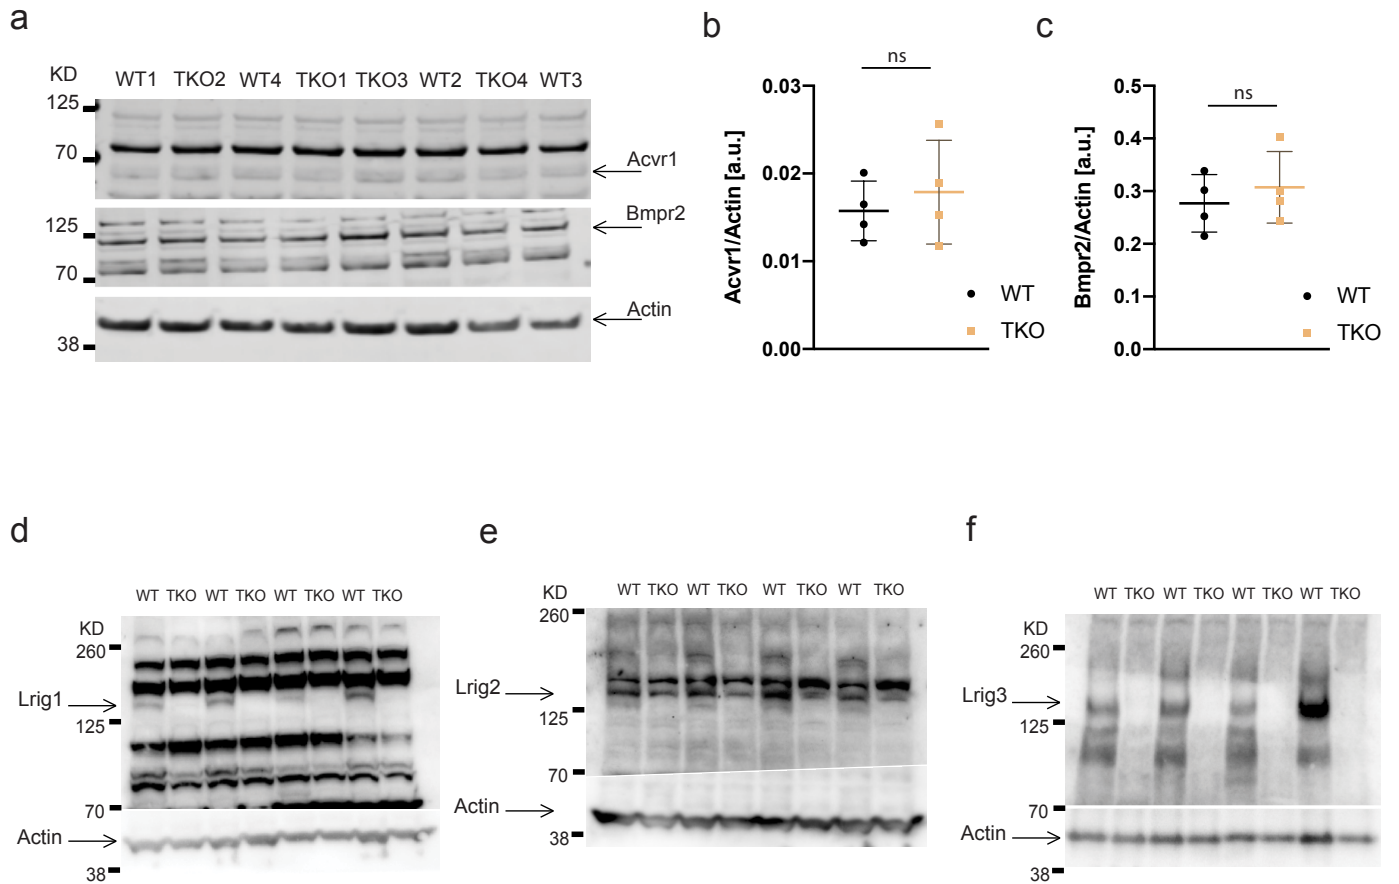

**Supplementary Figure 4: BMP receptor levels of wild-type and Lrig-null MEF lines and genotyping of MAPK reporter cell lines via Western blotting.** a-c Western blot analysis of Bmpr2, Acvr1, and actin in wild-type (WT) and Lrig-null (TKO) MEF lines. a Representative Western blots for Acvr1, Bmpr2, and actin, which was used as loading control. b Quantifications of the relative expression of Acvr1 in wild-type and Lrig-null MEFs. Shown are the results of three experimental repeats using four biological replicates of each genotype. c Quantifications of the relative Bmpr2 expression in wild-type and Lrig-null MEFs. Shown are the results of three experimental repeats using four biological replicates of each genotype. d-f An MEF line with floxed Lrig alleles was stably transduced with the MAPK luciferase reporter construct ELK1/SRF-luc. Thereafter, the cells were transiently transduced with Cre recombinase-expressing adenovirus or transduction control adenovirus on four different occasions, generating four wild-type MAPK reporter MEF lines (WT) and four Lrig-null MAPK reporter MEF lines (TKO). The Western blots show Lrig1 and actin (d), Lrig2 and actin (e), and Lrig3 and actin (f) protein bands for the four wild-type (WT) and the four Lrig-null (KO) MAPK reporter MEF lines. The expected sizes of the respective LRIG proteins and actin are indicated with arrows.

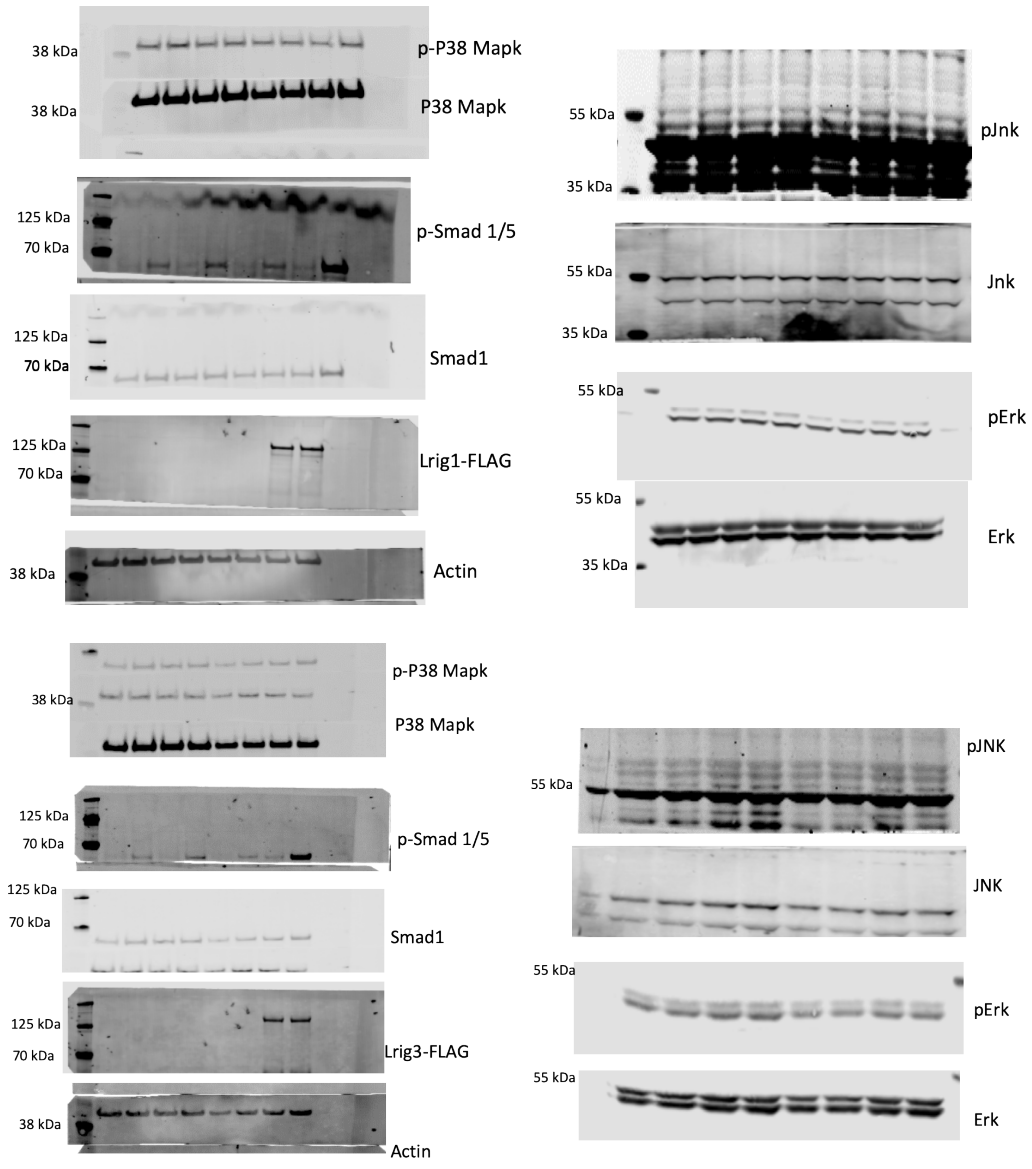

Supplementary Figure 5: Uncropped scans of Western blots in Fig. 3e, f.



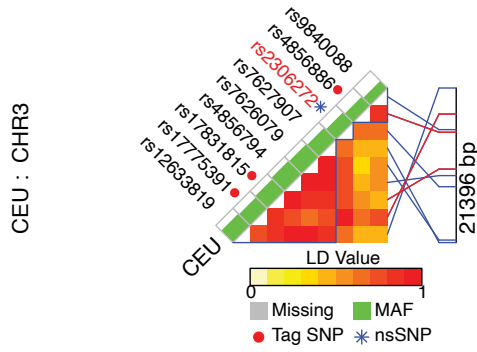

**Supplementary Figure 6: LRIG1 tag SNPs identified using online tool, SNPinfo.** To the left is information on population and chromosome name and to the right is the length of the chromosome within which the SNPs are contained. The green bars represent the minor allele frequency of each SNP in the selected population, CEU in this case. Tag SNPs are indicated by red dots, while a blue asterisk indicates a non-synonymous SNP.

## Supplementary Tables

**Supplementary Table 1.** Fraction of *Lrig3* knockout MEFs in the wild-type (WT1-4) and *Lrig*-null (TKO1-4) MEF lines.

|      | 0 days                                                                                    | 60 days                                                                                   |
|------|-------------------------------------------------------------------------------------------|-------------------------------------------------------------------------------------------|
|      | Ratio ( <i>Lrig3</i> exon1/reference exon) <sup>a,b</sup> (mean $\pm$ standard deviation) | Ratio ( <i>Lrig3</i> exon1/reference exon) <sup>a,b</sup> (mean $\pm$ standard deviation) |
| WT1  | 0.975 $\pm$ 0.035                                                                         | 0.960 $\pm$ 0.015                                                                         |
| WT2  | 0.944 $\pm$ 0.020                                                                         | 1.013 $\pm$ 0.045                                                                         |
| WT3  | 0.981 $\pm$ 0.029                                                                         | 1.469 $\pm$ 0.819                                                                         |
| WT4  | 1.105 $\pm$ 0.118                                                                         | 1.040 $\pm$ 0.025                                                                         |
| TKO1 | 0.001 $\pm$ 0.000                                                                         | 0.000 $\pm$ 0.000                                                                         |
| TKO2 | 0.004 $\pm$ 0.002                                                                         | 0.003 $\pm$ 0.002                                                                         |
| TKO3 | 0.000 $\pm$ 0.000                                                                         | 0.001 $\pm$ 0.000                                                                         |
| TKO4 | 0.000 $\pm$ 0.000                                                                         | 0.000 $\pm$ 0.000                                                                         |

<sup>a</sup> The proportion (ratio) of *Lrig3* knockout MEFs was determined by using a duplex ddPCR for *Lrig3* exon 1 together with a reference locus.

<sup>b</sup> Shown are the means and standard deviation of three technical replicates.

**Supplementary Table 2.** Forward scatter and side scatter mean values from wild-type (WT1-4) and *Lrig*-null (TKO1-4) MEF lines.

|      | Forward scatter <sup>a</sup> (mean $\pm$ standard deviation) | Side scatter <sup>a</sup> (mean $\pm$ standard deviation) |
|------|--------------------------------------------------------------|-----------------------------------------------------------|
| WT1  | 7269 $\pm$ 111                                               | 938 $\pm$ 101                                             |
| WT2  | 7680 $\pm$ 159                                               | 991 $\pm$ 45                                              |
| WT3  | 6769 $\pm$ 156                                               | 907 $\pm$ 88                                              |
| WT4  | 7388 $\pm$ 233                                               | 1008 $\pm$ 71                                             |
| TKO1 | 7342 $\pm$ 36                                                | 934 $\pm$ 65                                              |
| TKO2 | 7594 $\pm$ 131                                               | 985 $\pm$ 94                                              |
| TKO3 | 6153 $\pm$ 290                                               | 768 $\pm$ 87                                              |
| TKO4 | 7476 $\pm$ 96                                                | 1040 $\pm$ 117                                            |

<sup>a</sup> Shown are the means and standard deviation of three technical replicates.

**Supplementary Table 3.** Participants' characteristics, UK Biobank.

| Characteristic                    | Men            | Women          |
|-----------------------------------|----------------|----------------|
| Age (mean, SD), yrs               | 57.2 (8.1)     | 56.7 (7.9)     |
| BMI (mean, SD), kg/m <sup>2</sup> | 27.6 (3.8)     | 26.6 (4.4)     |
| Diabetes (N, %)                   |                |                |
| No                                | 172741 (54.7%) | 208199 (45.3%) |
| Yes                               | 6546 (36.6%)   | 11324 (63.4%)  |
| Cholesterol (mean, SD), mmol/L    | 5.5 (1.1)      | 5.9 (1.1)      |
| Triglycerides (mean, SD), mmol/L  | 2.0 (1.1)      | 1.6 (0.9)      |
| Liver fat % (mean, SD)            | 4.4 (4.6)      | 3.3 (4.2)      |

**Supplementary Table 4.** Genome-wide association significant *LRIG1* SNPs, UK Biobank.

| RS_id                  | Position | Allele1 | Allele2 | MAF      | Minor Allele | Info score |
|------------------------|----------|---------|---------|----------|--------------|------------|
| rs7627907              | 66426912 | A       | G       | 0.340631 | G            | 0.9981     |
| rs7626079              | 66427259 | C       | T       | 0.345515 | T            | 1          |
| rs2306272              | 66434643 | T       | C       | 0.287853 | C            | 1          |
| rs4856794              | 66436182 | T       | G       | 0.349079 | G            | 0.996736   |
| rs17831815             | 66437086 | T       | C       | 0.346928 | C            | 0.995861   |
| rs4856886              | 66442180 | T       | G       | 0.196361 | G            | 0.982886   |
| rs9840088              | 66442545 | A       | C       | 0.204582 | C            | 0.983441   |
| rs17775391             | 66444697 | A       | C       | 0.286741 | C            | 0.992446   |
| rs12633819             | 66448307 | A       | G       | 0.342479 | G            | 0.989515   |
| <b>Bold = tag SNPs</b> |          |         |         |          |              |            |

**Supplementary Table 5.** Association between *LRIG1* tag SNPs and BMI† in the UK Biobank.

| SNP_ref allele            | $\beta$ estimate | Std. error | 95% CI       | P value              |
|---------------------------|------------------|------------|--------------|----------------------|
| rs7627907_G               | 0.036            | 0.0098     | 0.017, 0.055 | $2.4 \times 10^{-4}$ |
| rs7626079_T               | 0.04             | 0.0098     | 0.021, 0.059 | $4.7 \times 10^{-5}$ |
| rs2306272_C               | 0.04             | 0.01       | 0.02, 0.061  | $8.2 \times 10^{-5}$ |
| rs4856794_G               | 0.038            | 0.0098     | 0.018, 0.057 | $1.2 \times 10^{-4}$ |
| rs17831815_C <sup>a</sup> | 0.038            | 0.0098     | 0.019, 0.057 | $1 \times 10^{-4}$   |
| rs4856886_G <sup>a</sup>  | 0.052            | 0.012      | 0.029, 0.075 | $1.2 \times 10^{-5}$ |
| rs9840088_C               | 0.052            | 0.012      | 0.029, 0.075 | $7.6 \times 10^{-6}$ |
| rs17775391_C <sup>a</sup> | 0.039            | 0.01       | 0.019, 0.059 | $1.3 \times 10^{-4}$ |
| rs12633819_G              | 0.036            | 0.0098     | 0.017, 0.055 | $2.5 \times 10^{-4}$ |

†Untransformed residuals used as outcome

<sup>a</sup> Tag SNPs.

**Supplementary Table 6.** Association between *LRIG1* SNPs and the risk of type 2 diabetes in the UK Biobank.

|                           | Not adjusted for BMI |                       | Adjusted for BMI <sup>†</sup> |                       |
|---------------------------|----------------------|-----------------------|-------------------------------|-----------------------|
| SNP_ref allele            | OR (95% CI)          | P value               | OR (95% CI)                   | P value               |
| rs7627907_G               | 0.967 (0.945, 0.989) | $3.67 \times 10^{-3}$ | 0.961 (0.939, 0.983)          | $7.23 \times 10^{-4}$ |
| rs7626079_T               | 0.967 (0.945, 0.989) | $3.68 \times 10^{-3}$ | 0.96 (0.938, 0.983)           | $5.55 \times 10^{-4}$ |
| rs2306272_C               | 0.971 (0.948, 0.994) | $1.38 \times 10^{-2}$ | 0.964 (0.941, 0.987)          | $2.85 \times 10^{-3}$ |
| rs4856794_G               | 0.968 (0.947, 0.99)  | $5.22 \times 10^{-3}$ | 0.962 (0.94, 0.985)           | $1.03 \times 10^{-3}$ |
| rs17831815_C <sup>a</sup> | 0.968 (0.946, 0.99)  | $4.89 \times 10^{-3}$ | 0.962 (0.94, 0.984)           | $9.57 \times 10^{-4}$ |
| rs4856886_G <sup>a</sup>  | 0.964 (0.938, 0.991) | $9.09 \times 10^{-3}$ | 0.954 (0.928, 0.981)          | $9.33 \times 10^{-4}$ |
| rs9840088_C               | 0.964 (0.938, 0.99)  | $8.02 \times 10^{-3}$ | 0.954 (0.928, 0.981)          | $8.53 \times 10^{-4}$ |
| rs17775391_C <sup>a</sup> | 0.971 (0.948, 0.994) | $1.38 \times 10^{-2}$ | 0.964 (0.941, 0.987)          | $2.88 \times 10^{-3}$ |
| rs12633819_G              | 0.965 (0.943, 0.987) | $2.25 \times 10^{-3}$ | 0.959 (0.937, 0.982)          | $4.38 \times 10^{-4}$ |

<sup>†</sup> Using untransformed BMI residuals

<sup>a</sup> Tag SNPs.

**Supplementary Table 7.** Association between *LRIG1* SNPs and triglyceride† levels in the UK Biobank.

| SNP                       | $\beta$ estimate | Std. error | 95% CI           | P value |
|---------------------------|------------------|------------|------------------|---------|
| rs7627907 G               | -0.0034          | 0.0024     | -0.0082, 0.0013  | 0.15    |
| rs7626079 T               | -0.003           | 0.0024     | -0.0078, 0.0017  | 0.21    |
| rs2306272 C               | -0.0034          | 0.0025     | -0.0083, 0.0016  | 0.19    |
| rs4856794 G               | -0.0036          | 0.0024     | -0.0083, 0.0011  | 0.13    |
| rs17831815 C <sup>a</sup> | -0.0037          | 0.0024     | -0.0085, 0.001   | 0.12    |
| rs4856886 G <sup>a</sup>  | -0.0073          | 0.0029     | -0.013, -0.0016  | 0.012   |
| rs9840088 C               | -0.0063          | 0.0029     | -0.012, -0.00069 | 0.028   |
| rs17775391 C <sup>a</sup> | -0.0044          | 0.0025     | -0.0093, 0.00061 | 0.086   |
| rs12633819 G              | -0.0031          | 0.0024     | -0.0078, 0.0017  | 0.21    |

†Inverse normal transformed residuals used as the outcome.

<sup>a</sup> Tag SNPs.

**Supplementary Table 8.** Associations between *LRIG1* SNPs and liver fat percentage† in the UK Biobank (n = 3,192).

| SNP                       | $\beta$ estimate | Std. error | 95% CI        | P value |
|---------------------------|------------------|------------|---------------|---------|
| rs7627907 G               | 0.015            | 0.024      | -0.032, 0.062 | 0.53    |
| rs7626079 T               | 0.026            | 0.024      | -0.022, 0.073 | 0.29    |
| rs2306272 C               | -0.019           | 0.025      | -0.068, 0.03  | 0.45    |
| rs4856794 G               | 0.011            | 0.024      | -0.037, 0.058 | 0.66    |
| rs17831815 C <sup>a</sup> | 0.0072           | 0.024      | -0.040, 0.054 | 0.76    |
| rs4856886 G <sup>a</sup>  | -0.012           | 0.029      | -0.068, 0.045 | 0.69    |
| rs9840088 C               | -0.0074          | 0.028      | -0.063, 0.048 | 0.8     |
| rs17775391 C <sup>a</sup> | -0.011           | 0.025      | -0.061, 0.038 | 0.65    |
| rs12633819 G              | 0.018            | 0.024      | -0.029, 0.066 | 0.46    |

†Inverse normal transformed liver fat % residuals used as the outcome.

<sup>a</sup> Tag SNPs.

**Supplementary Table 9.** Associations between *LRIG1* SNPs and adipose morphology.

| SNP           | CH<br>R | POS          | RE<br>F | AL<br>T | TES<br>T | OBS<br>CT | BET<br>A | SE  | L95  | U95 | T_S<br>TAT | P         | Ref<br>freq |
|---------------|---------|--------------|---------|---------|----------|-----------|----------|-----|------|-----|------------|-----------|-------------|
| rs4856<br>886 | 3       | 6644<br>2180 | G       | T       | ADD      | 894       | 20.2     | 9.8 | 39.4 | 1.1 | 2.07       | 0.03<br>9 | 0.19        |
| rs9840<br>088 | 3       | 6644<br>2545 | C       | A       | ADD      | 894       | 23.7     | 9.7 | 42.7 | 4.7 | 2.45       | 0.01<br>5 | 0.19        |

**Supplementary Table 10.** Antibodies used in the study.

| Antigen                                | Host   | Company                         | Catalog no. | Lot no.    | Application <sup>a</sup> | Dilution                        |
|----------------------------------------|--------|---------------------------------|-------------|------------|--------------------------|---------------------------------|
| Lrig1                                  | Rabbit | N/A:<br>generated<br>in-house   | mLrig1-255  | 2532U      | WB                       | 1:500                           |
| Lrig2                                  | Rabbit | Agrisera                        | AS142788    | 2534U      | WB                       | 1:350                           |
| Lrig3                                  | Rabbit | Agrisera                        | AS142789    | 2536U      | WB                       | 1:500                           |
| PPAR $\gamma$                          | Rabbit | Cell<br>Signaling<br>Technology | 2435        | 6          | WB                       | 1:1,000                         |
| FABP4                                  | Rabbit | Cell<br>Signaling<br>Technology | 2120        | 3          | WB                       | 1:1,000                         |
| Actin                                  | Mouse  | Abcam                           | ab3280      | gr297708-1 | WB                       | 1:5,000                         |
| Actin                                  | Rabbit | Sigma-<br>Aldrich               | A2066       | 057k4803   | WB                       | 1:7,000                         |
| Smad1                                  | Rabbit | Cell<br>Signaling<br>Technology | 6944S       | 5          | WB                       | 1:1,000                         |
| pSmad1/5                               | Rabbit | Cell<br>Signaling<br>Technology | 9516        | 9          | WB, ICC                  | 1:800                           |
| p38                                    | Rabbit | Cell<br>Signaling<br>Technology | 9212S       | 26         | WB                       | 1:1,000                         |
| phospho-<br>p38                        | Rabbit | Cell<br>Signaling<br>Technology | 9211S       | 24         | WB                       | 1:1,000                         |
| SAPK/JNK                               | Rabbit | Cell<br>Signaling<br>Technology | 9252s       | 17         | WB                       | 1:1,000                         |
| Phospho-<br>SAPK/JNK                   | Mouse  | Cell<br>Signaling<br>Technology | 9255s       | 33         | WB                       | 1:2,000                         |
| p44/42<br>MAPK<br>(Erk1/2)             | Rabbit | Cell<br>Signaling<br>Technology | 4695s       | 28         | WB                       | 1:1,000                         |
| Phospho-<br>p44/42<br>MAPK<br>(Erk1/2) | Rabbit | Cell<br>Signaling<br>Technology | 4370s       | 24         | WB                       | 1:2,000                         |
| FLAG M2                                | Mouse  | Sigma-<br>Aldrich               | F3165       | SLBT6752   | WB,<br>FACS,<br>ICC      | 1:5,000,<br>1:1,000,<br>1:5,000 |

|                             |        |                    |            |              |           |          |
|-----------------------------|--------|--------------------|------------|--------------|-----------|----------|
| ACVR1                       | Rabbit | Novus biologicals  | NBP1-33500 | 40142        | WB        | 1:500    |
| Bmpr2                       | Mouse  | Fisher Scientific  | 3F6F8      | td269789     | WB        | 1:500    |
| Mouse IgG HRP               |        | GE Healthcare      | na9310v    | 10370044     | WB        | 1:20,000 |
| Rabbit IgG HRP              |        | GE Healthcare      | na934vs    | 9833234      | WB        | 1:20,000 |
| Mouse IgG IRDye 800CW       | Goat   | LI-COR Biosciences | 926-32210  | C31021-01    | WB        | 1:15,000 |
| Rabbit IgG IRDye 680RD      | Goat   | LI-COR Biosciences | 925-68071  | C60329-11    | WB        | 1:15,000 |
| Alexa fluor anti-rabbit 647 | Goat   | Invitrogen         | A-21245    | 2051068      | FACS, ICC | 1:1,000  |
| Alexa fluor anti-mouse 488  | Donkey | Invitrogen         | A-21202    | 1305303      | ICC       | 1:1,000  |
| pSmad3                      | Rabbit | Abcam              | ab52903    | gr3194559-10 | ICC       | 1:1,000  |

<sup>a</sup>WB, Western blotting; ICC, immunocytochemistry; FACS, flow cytometry
