# Supplementary material for: LRIG proteins regulate lipid metabolism via BMP signaling and affect the risk of type 2 diabetes
Source: PubMed Central journal article supplement (PMC7815736; doi:10.1038/s42003-020-01613-w), 2021-01-19
Supplement: 42003_2020_1613_MOESM2_ESM.pdf [file 42003_2020_1613_MOESM2_ESM.pdf]

## **Description of Additional Supplementary Files**

File Name: Supplementary Data 1

Description: All source data underlying the graphs in the main figures.
